# Supplementary material for: Identification and Characterization of Polymorphisms in piRNA Regions
Source: MDPI journal article supplement (doi:10.3390/cimb44020062), 2022-02-15
Supplement: s1 [file s1]

**Supplementary Materials:**

**Supplementary Table S1. SNP rates per chromosome and genomic structure.**

| <b>Chrom</b> | <b>Type</b> | <b>piRNAs</b> | <b>miRNAs</b> | <b>Exons</b> | <b>Non-Exons</b> |
|--------------|-------------|---------------|---------------|--------------|------------------|
| 1            | SNP         | 5.643e-04     | 3.016e-04     | 3.715e-04    | 5.487e-04        |
| 2            | SNP         | 5.859e-04     | 6.888e-04     | 3.553e-04    | 5.624e-04        |
| 3            | SNP         | 6.426e-04     | 4.112e-04     | 3.551e-04    | 5.775e-04        |
| 4            | SNP         | 7.453e-04     | 3.679e-04     | 4.156e-04    | 5.804e-04        |
| 5            | SNP         | 5.933e-04     | 6.097e-04     | 3.433e-04    | 5.084e-04        |
| 6            | SNP         | 6.883e-04     | 6.458e-04     | 4.397e-04    | 5.673e-04        |
| 7            | SNP         | 6.467e-04     | 3.408e-04     | 3.971e-04    | 5.782e-04        |
| 8            | SNP         | 6.440e-04     | 5.335e-04     | 3.921e-04    | 8.016e-04        |
| 9            | SNP         | 5.576e-04     | 3.182e-04     | 3.571e-04    | 5.764e-04        |
| 10           | SNP         | 6.310e-04     | 6.429e-04     | 4.010e-04    | 6.141e-04        |
| 11           | SNP         | 6.166e-04     | 3.726e-04     | 3.710e-04    | 5.986e-04        |
| 12           | SNP         | 6.513e-04     | 7.381e-04     | 3.628e-04    | 5.554e-04        |
| 13           | SNP         | 6.702e-04     | 2.320e-04     | 3.577e-04    | 5.839e-04        |
| 14           | SNP         | 5.988e-04     | 4.005e-04     | 4.068e-04    | 5.608e-04        |
| 15           | SNP         | 5.847e-04     | 4.022e-04     | 3.587e-04    | 5.734e-04        |
| 16           | SNP         | 5.802e-04     | 5.899e-04     | 4.065e-04    | 6.580e-04        |
| 17           | SNP         | 6.017e-04     | 7.270e-04     | 4.082e-04    | 5.466e-04        |
| 18           | SNP         | 7.138e-04     | 1.897e-04     | 4.068e-04    | 5.506e-04        |
| 19           | SNP         | 6.887e-04     | 4.832e-04     | 5.610e-04    | 7.169e-04        |
| 20           | SNP         | 6.044e-04     | 6.978e-04     | 3.840e-04    | 5.313e-04        |
| 21           | SNP         | 7.440e-04     | 2.017e-04     | 4.639e-04    | 5.951e-04        |
| 22           | SNP         | 6.459e-04     | 3.420e-04     | 4.514e-04    | 6.170e-04        |
| X            | SNP         | 4.787e-04     | 1.182e-04     | 2.287e-04    | 3.264e-04        |
| Y            | SNP         | 1.350e-05     | 0.000e+00     | 1.432e-05    | 1.527e-05        |

**Supplementary Table S2. Pairwise comparisons of INDEL rates in piRNA, miRNA, exonic and non-exonic regions.**

| Group 1                                                                                                           | Group 2   | p-value adjusted | p-value adjusted significant |
|-------------------------------------------------------------------------------------------------------------------|-----------|------------------|------------------------------|
| piRNAs                                                                                                            | miRNAs    | 3.518e-04        | ***                          |
| piRNAs                                                                                                            | Exons     | 2.116e-07        | ****                         |
| piRNAs                                                                                                            | Non-Exons | 8.922e-02        | ns                           |
| miRNAs                                                                                                            | Exons     | 8.922e-02        | ns                           |
| miRNAs                                                                                                            | Non-Exons | 6.028e-02        | ns                           |
| Exons                                                                                                             | Non-Exons | 3.518e-04        | ***                          |
| Dunn's-test for multiple comparisons of independent samples and p-values adjusted by Benjamini-Hochberg's method. |           |                  |                              |

**Supplementary Table S3. INDEL rates per chromosome and genomic structure.**

| Chrom | Type  | piRNAs    | miRNAs    | Exons     | Non-Exons |
|-------|-------|-----------|-----------|-----------|-----------|
| 1     | INDEL | 1.885e-05 | 1.619e-05 | 2.909e-05 | 8.857e-05 |
| 2     | INDEL | 1.424e-05 | 6.495e-05 | 2.687e-05 | 8.699e-05 |
| 3     | INDEL | 1.698e-05 | 6.817e-05 | 3.171e-05 | 8.955e-05 |
| 4     | INDEL | 2.301e-05 | 1.670e-04 | 4.857e-05 | 9.467e-05 |
| 5     | INDEL | 1.822e-05 | 5.400e-05 | 3.599e-05 | 8.559e-05 |
| 6     | INDEL | 2.417e-05 | 1.075e-04 | 3.751e-05 | 9.108e-05 |
| 7     | INDEL | 1.738e-05 | 2.067e-05 | 3.054e-05 | 9.094e-05 |
| 8     | INDEL | 1.806e-05 | 5.851e-05 | 4.110e-05 | 9.376e-05 |
| 9     | INDEL | 1.704e-05 | 2.400e-05 | 3.036e-05 | 8.794e-05 |
| 10    | INDEL | 2.215e-05 | 4.178e-05 | 4.069e-05 | 9.512e-05 |
| 11    | INDEL | 2.306e-05 | 4.439e-06 | 3.716e-05 | 8.955e-05 |
| 12    | INDEL | 2.176e-05 | 1.447e-04 | 4.986e-05 | 9.393e-05 |
| 13    | INDEL | 2.380e-05 | 4.502e-05 | 3.154e-05 | 9.839e-05 |
| 14    | INDEL | 2.030e-05 | 1.822e-05 | 3.499e-05 | 9.615e-05 |
| 15    | INDEL | 2.335e-05 | 1.099e-04 | 4.012e-05 | 8.564e-05 |
| 16    | INDEL | 1.909e-05 | 2.120e-06 | 3.722e-05 | 9.262e-05 |
| 17    | INDEL | 2.023e-05 | 2.484e-05 | 4.390e-05 | 9.167e-05 |
| 18    | INDEL | 2.246e-05 | 7.073e-07 | 4.094e-05 | 8.173e-05 |
| 19    | INDEL | 2.277e-05 | 1.589e-05 | 4.040e-05 | 1.106e-04 |
| 20    | INDEL | 1.452e-05 | 3.408e-06 | 3.227e-05 | 8.429e-05 |
| 21    | INDEL | 1.542e-05 | 1.099e-06 | 3.672e-05 | 9.691e-05 |
| 22    | INDEL | 9.950e-06 | 5.640e-05 | 3.878e-05 | 1.029e-04 |
| X     | INDEL | 1.290e-05 | 6.570e-05 | 2.521e-05 | 6.413e-05 |
| Y     | INDEL | 0.000e+00 | 0.000e+00 | 1.929e-07 | 8.731e-07 |

**Supplementary Table S4. Pairwise comparisons of INDEL rates in piRNA, miRNA, exonic and non-exonic regions.**

| Group 1                                                                                                           | Group 2 | p-value adjusted | p-value adjusted significant |
|-------------------------------------------------------------------------------------------------------------------|---------|------------------|------------------------------|
| -1000                                                                                                             | 5'      | 5.839e-06        | ****                         |
| -1000                                                                                                             | piRNAs  | 2.912e-11        | ****                         |
| -1000                                                                                                             | 3'      | 3.077e-01        | ns                           |
| -1000                                                                                                             | +1000   | 8.259e-01        | ns                           |
| 5'                                                                                                                | piRNAs  | 3.897e-02        | *                            |
| 5'                                                                                                                | 3'      | 5.527e-04        | ***                          |
| 5'                                                                                                                | +1000   | 2.441e-06        | ****                         |
| piRNAs                                                                                                            | 3'      | 2.254e-08        | ****                         |
| piRNAs                                                                                                            | +1000   | 1.214e-11        | ****                         |
| 3'                                                                                                                | +1000   | 2.390e-01        | ns                           |
| Dunn's-test for multiple comparisons of independent samples and p-values adjusted by Benjamini-Hochberg's method. |         |                  |                              |

**Supplementary Table S5. INDEL rates in piRNA, flanking and adjacent regions.**

| Chrom | Type  | -1000     | 5'        | piRNAs    | 3'        | +1000     |
|-------|-------|-----------|-----------|-----------|-----------|-----------|
| chr1  | INDEL | 9.205e-05 | 5.461e-05 | 1.885e-05 | 9.092e-05 | 9.893e-05 |
| chr2  | INDEL | 9.222e-05 | 4.393e-05 | 1.424e-05 | 8.117e-05 | 9.506e-05 |
| chr3  | INDEL | 9.359e-05 | 5.279e-05 | 1.698e-05 | 9.861e-05 | 9.647e-05 |
| chr4  | INDEL | 9.706e-05 | 5.104e-05 | 2.301e-05 | 9.353e-05 | 1.032e-04 |
| chr5  | INDEL | 9.399e-05 | 5.302e-05 | 1.822e-05 | 8.813e-05 | 1.047e-04 |
| chr6  | INDEL | 1.145e-04 | 5.829e-05 | 2.417e-05 | 8.883e-05 | 1.029e-04 |
| chr7  | INDEL | 1.045e-04 | 4.928e-05 | 1.738e-05 | 8.438e-05 | 1.041e-04 |
| chr8  | INDEL | 8.657e-05 | 5.466e-05 | 1.806e-05 | 7.885e-05 | 9.947e-05 |
| chr9  | INDEL | 9.092e-05 | 4.113e-05 | 1.704e-05 | 9.181e-05 | 8.509e-05 |
| chr10 | INDEL | 9.184e-05 | 4.882e-05 | 2.215e-05 | 1.025e-04 | 9.719e-05 |
| chr11 | INDEL | 9.804e-05 | 5.494e-05 | 2.306e-05 | 9.637e-05 | 9.316e-05 |
| chr12 | INDEL | 1.159e-04 | 5.666e-05 | 2.176e-05 | 9.877e-05 | 1.104e-04 |
| chr13 | INDEL | 1.143e-04 | 5.670e-05 | 2.380e-05 | 1.006e-04 | 1.147e-04 |
| chr14 | INDEL | 1.104e-04 | 4.953e-05 | 2.030e-05 | 1.079e-04 | 1.186e-04 |
| chr15 | INDEL | 9.175e-05 | 5.859e-05 | 2.335e-05 | 7.138e-05 | 8.737e-05 |
| chr16 | INDEL | 8.921e-05 | 4.041e-05 | 1.909e-05 | 7.978e-05 | 9.375e-05 |
| chr17 | INDEL | 1.180e-04 | 5.343e-05 | 2.023e-05 | 8.881e-05 | 1.127e-04 |
| chr18 | INDEL | 9.056e-05 | 4.875e-05 | 2.246e-05 | 9.615e-05 | 9.224e-05 |
| chr19 | INDEL | 1.299e-04 | 5.562e-05 | 2.277e-05 | 1.059e-04 | 1.307e-04 |
| chr20 | INDEL | 1.112e-04 | 5.155e-05 | 1.452e-05 | 1.078e-04 | 1.087e-04 |
| chr21 | INDEL | 1.188e-04 | 5.567e-05 | 1.542e-05 | 1.204e-04 | 9.656e-05 |
| chr22 | INDEL | 1.094e-04 | 5.957e-05 | 9.950e-06 | 1.018e-04 | 1.157e-04 |
| chrX  | INDEL | 8.168e-05 | 3.353e-05 | 1.290e-05 | 7.219e-05 | 8.648e-05 |
| chrY  | INDEL | 6.633e-07 | 3.078e-07 | 0.000e+00 | 2.487e-07 | 2.956e-08 |

**Supplementary Table S6. Pairwise comparisons of INDEL rates in piRNA, flanking and adjacent regions.**

| Group 1                                                                                                           | Group 2 | p-value adjusted | p-value adjusted significant |
|-------------------------------------------------------------------------------------------------------------------|---------|------------------|------------------------------|
| -1000                                                                                                             | 5'      | 5.839e-06        | ****                         |
| -1000                                                                                                             | piRNAs  | 2.912e-11        | ****                         |
| -1000                                                                                                             | 3'      | 3.077e-01        | ns                           |
| -1000                                                                                                             | +1000   | 8.259e-01        | ns                           |
| 5'                                                                                                                | piRNAs  | 3.897e-02        | *                            |
| 5'                                                                                                                | 3'      | 5.527e-04        | ***                          |
| 5'                                                                                                                | +1000   | 2.441e-06        | ****                         |
| piRNAs                                                                                                            | 3'      | 2.254e-08        | ****                         |
| piRNAs                                                                                                            | +1000   | 1.214e-11        | ****                         |
| 3'                                                                                                                | +1000   | 2.390e-01        | ns                           |
| Dunn's-test for multiple comparisons of independent samples and p-values adjusted by Benjamini-Hochberg's method. |         |                  |                              |

**Supplementary Table S7. SNP rates in piRNA regions by nucleotide (NT).**

| Chrom                                          | Type | NT 1      | NT 2      | NT 3      | NT 17     | NT 26     | NT 31     |
|------------------------------------------------|------|-----------|-----------|-----------|-----------|-----------|-----------|
| chr1                                           | SNP  | 3.819e-02 | 4.141e-02 | 3.165e-02 | 3.223e-02 | 2.514e-02 | 2.874e-02 |
| chr2                                           | SNP  | 4.329e-02 | 4.040e-02 | 3.447e-02 | 2.855e-02 | 2.504e-02 | 2.357e-02 |
| chr3                                           | SNP  | 4.075e-02 | 4.718e-02 | 3.572e-02 | 2.796e-02 | 2.112e-02 | 3.022e-02 |
| chr4                                           | SNP  | 3.923e-02 | 5.026e-02 | 4.246e-02 | 3.535e-02 | 2.739e-02 | 3.201e-02 |
| chr5                                           | SNP  | 4.170e-02 | 4.007e-02 | 3.421e-02 | 2.933e-02 | 2.800e-02 | 2.682e-02 |
| chr6                                           | SNP  | 4.257e-02 | 3.681e-02 | 4.334e-02 | 3.136e-02 | 2.346e-02 | 2.705e-02 |
| chr7                                           | SNP  | 4.551e-02 | 4.324e-02 | 4.012e-02 | 3.558e-02 | 2.570e-02 | 3.242e-02 |
| chr8                                           | SNP  | 4.240e-02 | 2.850e-02 | 3.336e-02 | 3.176e-02 | 3.077e-02 | 2.667e-02 |
| chr9                                           | SNP  | 4.132e-02 | 4.248e-02 | 3.089e-02 | 2.972e-02 | 2.008e-02 | 3.256e-02 |
| chr10                                          | SNP  | 4.177e-02 | 4.151e-02 | 4.513e-02 | 3.659e-02 | 2.303e-02 | 2.473e-02 |
| chr11                                          | SNP  | 3.991e-02 | 4.916e-02 | 3.765e-02 | 3.121e-02 | 3.203e-02 | 2.749e-02 |
| chr12                                          | SNP  | 4.259e-02 | 3.859e-02 | 3.549e-02 | 4.037e-02 | 2.733e-02 | 3.020e-02 |
| chr13                                          | SNP  | 4.503e-02 | 4.744e-02 | 3.606e-02 | 4.267e-02 | 2.826e-02 | 3.016e-02 |
| chr14                                          | SNP  | 4.982e-02 | 3.770e-02 | 2.864e-02 | 2.384e-02 | 2.301e-02 | 2.833e-02 |
| chr15                                          | SNP  | 3.414e-02 | 4.556e-02 | 3.840e-02 | 2.458e-02 | 2.683e-02 | 2.048e-02 |
| chr16                                          | SNP  | 4.357e-02 | 5.000e-02 | 3.051e-02 | 2.724e-02 | 3.064e-02 | 2.592e-02 |
| chr17                                          | SNP  | 3.360e-02 | 4.060e-02 | 3.784e-02 | 2.516e-02 | 3.692e-02 | 2.520e-02 |
| chr18                                          | SNP  | 4.743e-02 | 4.678e-02 | 3.937e-02 | 2.380e-02 | 2.498e-02 | 3.175e-02 |
| chr19                                          | SNP  | 4.324e-02 | 4.874e-02 | 4.127e-02 | 2.676e-02 | 3.011e-02 | 3.507e-02 |
| chr20                                          | SNP  | 3.883e-02 | 3.652e-02 | 4.787e-02 | 3.032e-02 | 3.030e-02 | 2.175e-02 |
| chr21                                          | SNP  | 3.883e-02 | 4.982e-02 | 5.119e-02 | 3.640e-02 | 4.802e-02 | 2.828e-02 |
| chr22                                          | SNP  | 3.340e-02 | 4.444e-02 | 3.904e-02 | 3.597e-02 | 2.337e-02 | 1.897e-02 |
| chrX                                           | SNP  | 3.636e-02 | 3.608e-02 | 2.929e-02 | 2.682e-02 | 2.958e-02 | 2.456e-02 |
| chrY                                           | SNP  | 5.970e-03 | 8.600e-03 | 3.770e-02 | 8.600e-03 | 1.160e-03 | 1.720e-03 |
| Only NTs with highest or lowest conservations. |      |           |           |           |           |           |           |

**Supplementary Table S8. INDEL rates in piRNA regions by nucleotide (NT).**

| Chrom                                          | Type  | NT 7      | NT 32     |
|------------------------------------------------|-------|-----------|-----------|
| chr1                                           | INDEL | 1.000e-05 | 1.850e-03 |
| chr2                                           | INDEL | 1.500e-04 | 5.530e-03 |
| chr3                                           | INDEL | 4.000e-05 | 2.110e-03 |
| chr4                                           | INDEL | 2.400e-04 | 2.200e-04 |
| chr5                                           | INDEL | 6.000e-05 | 6.000e-05 |
| chr6                                           | INDEL | 3.100e-04 | 1.680e-03 |
| chr7                                           | INDEL | 1.700e-04 | 3.030e-03 |
| chr8                                           | INDEL | 2.300e-04 | 8.400e-04 |
| chr9                                           | INDEL | 1.400e-04 | 7.780e-03 |
| chr10                                          | INDEL | 5.100e-04 | 1.720e-03 |
| chr11                                          | INDEL | 1.300e-04 | 4.960e-03 |
| chr12                                          | INDEL | 3.800e-04 | 4.740e-03 |
| chr13                                          | INDEL | 2.300e-04 | 3.000e-05 |
| chr14                                          | INDEL | 5.900e-04 | 3.000e-05 |
| chr15                                          | INDEL | 1.000e-05 | 3.450e-03 |
| chr16                                          | INDEL | 6.700e-04 | 4.910e-03 |
| chr17                                          | INDEL | 3.300e-04 | 3.210e-03 |
| chr18                                          | INDEL | 2.200e-04 | 2.740e-03 |
| chr19                                          | INDEL | 1.400e-04 | 3.270e-03 |
| chr20                                          | INDEL | 1.100e-04 | 4.000e-05 |
| chr21                                          | INDEL | 1.200e-04 | 6.280e-03 |
| chr22                                          | INDEL | 3.300e-04 | 6.600e-04 |
| chrX                                           | INDEL | 6.000e-05 | 4.610e-03 |
| chrY                                           | INDEL | NA        | NA        |
| Only NTs with highest or lowest conservations. |       |           |           |
